# Supplementary material
Source: PubMed Central journal article supplement (PMC1820710)

**A**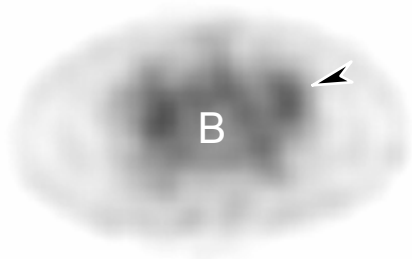**B**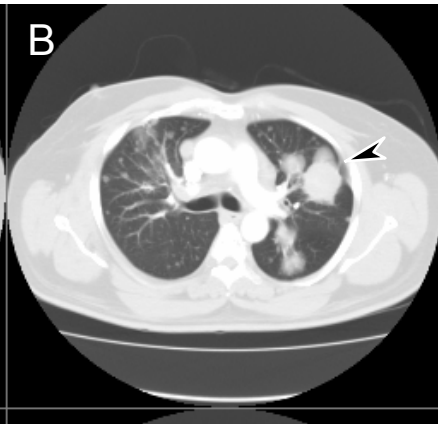**C**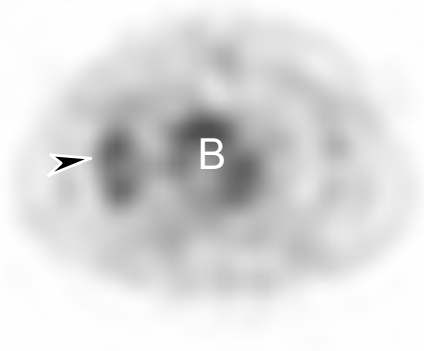**D**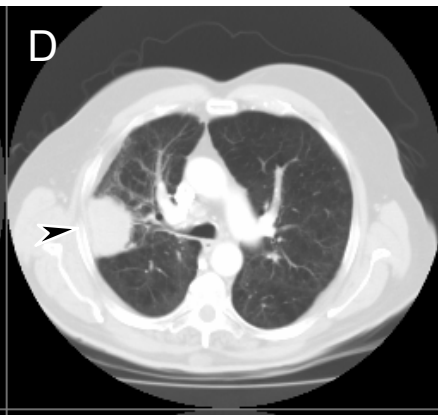

Supplement: pnas_0611693104_1.pdf [file pnas_0611693104_1.pdf]
